# Supplementary material for: Post-marketing safety concerns with rimegepant based on a pharmacovigilance study
Source: PubMed Central journal article supplement — J Headache Pain. 2024 Oct 7;25(1):169. doi: 10.1186/s10194-024-01858-4 (PMC11460227; doi:10.1186/s10194-024-01858-4), 2024-10-07
Supplement: 10194_2024_1858_MOESM1_ESM.pdf [file 10194_2024_1858_MOESM1_ESM.pdf]

**Supplementary Table S1.** Fourfold table of disproportionality analysis for rimegepant signal detection.

|                                                        | Reports with target adverse event | Reports with other adverse events |
|--------------------------------------------------------|-----------------------------------|-----------------------------------|
| Reports with rimegepant as the primary suspected drug  | a                                 | b                                 |
| Reports with other drugs as the primary suspected drug | c                                 | d                                 |

a, number of reports containing both rimegepant and target adverse event; b, number of reports containing other adverse events of rimegepant; c, number of reports containing target adverse event of other drugs; d, number of reports containing other drugs and other adverse events.

**Supplementary Table S2.** Equations and criteria of four algorithms for rimegepant signal detection.

| Algorithms | Equation                                                                                                                               | Criteria                        |
|------------|----------------------------------------------------------------------------------------------------------------------------------------|---------------------------------|
| ROR        | $ROR=(ad)/(bc)$                                                                                                                        | Lower limit of 95% CI>1,<br>N≥2 |
|            | Lower limit of 95% CI= $e^{\ln(ROR)-1.96(1/a+1/b+1/c+1/d)^{0.5}}$<br>Upper limit of 95% CI= $e^{\ln(ROR)+1.96(1/a+1/b+1/c+1/d)^{0.5}}$ |                                 |
| PRR        | $PRR=a(c+d)/c/(a+b)$<br>$\chi^2=[(ad-bc)^2(a+b+c+d)/[(a+b)(c+d)(a+c)(b+d)]$                                                            | PRR≥2, $\chi^2 \geq 4$ , N≥3    |
| BCPNN      | $IC=\log_2 a(a+b+c+d)/(a+c)/(a+b)$<br>$IC025=E(IC)-2V(IC)^{0.5}$                                                                       | IC025>0                         |
| MGPS       | $EBGM=a(a+b+c+d)/(a+c)/(a+b)$<br>$EBGM05=e^{\ln(EBGM)-1.96(1/a+1/b+1/c+1/d)^{0.5}}$                                                    | EBGM05>2                        |

N, number of reports; 95% CI, 95% confidence interval; IC, information component; IC025, lower limit of 95% confidence interval of IC; E(IC), IC expectation; V(IC), variance of IC; EBGM, empirical Bayesian geometric mean; EBGM05, lower limit of 95% confidence interval of EBGM.

**Supplementary Table S3.** Fourfold table of disproportionality analysis for difference detection of rimegepant signals.

|          | Reports with target adverse event | Reports with other adverse events |
|----------|-----------------------------------|-----------------------------------|
| Factor 1 | a                                 | b                                 |
| Factor 2 | c                                 | d                                 |

a, number of reports conforming to factor 1, containing the target adverse event with rimegepant identified as the primary suspected drug; b, number of reports conforming to factor 1, containing other adverse events with rimegepant identified as the primary suspected drug; c, number of reports conforming to factor 2, containing the target adverse event with rimegepant identified as the primary suspected drug; d, number of reports conforming to factor 2, containing other adverse events with rimegepant identified as the primary suspected drug.

**Supplementary Table S4.** Criteria of ROR and Fisher's exact test for difference detection of rimegepant signals.

|                                              | ROR                                    | Fisher's exact test |
|----------------------------------------------|----------------------------------------|---------------------|
| Signals that factor 1 more likely to develop | ROR>1, Lower limit of 95% CI>1,<br>N≥2 | P<0.05              |
| Signals that factor 2 more likely to develop | ROR<1, Upper limit of 95% CI<1,<br>N≥2 | P<0.05              |

**Supplementary Table S5.** Case number and signal strength of rimegepant at the SOC level.

| SOC                                                                                  | Case Number | ROR  | Lower limit of 95% CI | PRR  | $\chi^2$ | IC    | IC025 | EBGM | EBGM05 |
|--------------------------------------------------------------------------------------|-------------|------|-----------------------|------|----------|-------|-------|------|--------|
| General disorders and administration site conditions (SOC: 10018065) <sup>abcd</sup> | 4501        | 3.69 | 3.55                  | 2.50 | 4915.53  | 1.32  | 1.27  | 2.50 | 2.40   |
| Gastrointestinal disorders (SOC: 10017947) <sup>ac</sup>                             | 1542        | 2.13 | 2.02                  | 1.96 | 785.13   | 0.97  | 0.89  | 1.96 | 1.86   |
| Nervous system disorders (SOC: 10029205) <sup>ac</sup>                               | 1256        | 1.83 | 1.72                  | 1.73 | 412.06   | 0.79  | 0.70  | 1.72 | 1.63   |
| Injury, poisoning and procedural complications (SOC: 10022117)                       | 686         | 0.53 | 0.50                  | 0.57 | 258.64   | -0.82 | -0.93 | 0.57 | 0.52   |
| Skin and subcutaneous tissue disorders (SOC: 10040785)                               | 446         | 0.83 | 0.76                  | 0.84 | 14.23    | -0.25 | -0.39 | 0.84 | 0.76   |
| Psychiatric disorders (SOC: 10037175)                                                | 349         | 0.60 | 0.54                  | 0.61 | 90.30    | -0.71 | -0.86 | 0.61 | 0.55   |
| Respiratory, thoracic and mediastinal disorders (SOC: 10038738)                      | 180         | 0.38 | 0.33                  | 0.40 | 173.93   | -1.34 | -1.55 | 0.40 | 0.34   |
| Immune system disorders (SOC: 10021428) <sup>ac</sup>                                | 179         | 1.61 | 1.39                  | 1.60 | 40.42    | 0.68  | 0.45  | 1.60 | 1.38   |
| Product issues (SOC: 10077536)                                                       | 167         | 0.92 | 0.79                  | 0.92 | 1.20     | -0.12 | -0.35 | 0.92 | 0.79   |
| Musculoskeletal and connective tissue disorders (SOC: 10028395)                      | 152         | 0.27 | 0.23                  | 0.29 | 286.96   | -1.81 | -2.04 | 0.29 | 0.24   |
| Investigations (SOC: 10022891)                                                       | 128         | 0.20 | 0.17                  | 0.21 | 399.19   | -2.24 | -2.49 | 0.21 | 0.18   |
| Infections and infestations (SOC: 10021881)                                          | 117         | 0.20 | 0.16                  | 0.21 | 378.10   | -2.28 | -2.53 | 0.21 | 0.17   |
| Eye disorders (SOC: 10015919)                                                        | 113         | 0.59 | 0.49                  | 0.60 | 31.64    | -0.75 | -1.01 | 0.60 | 0.49   |
| Vascular disorders (SOC: 10047065)                                                   | 72          | 0.38 | 0.30                  | 0.38 | 73.67    | -1.39 | -1.72 | 0.38 | 0.30   |
| Ear and labyrinth disorders (SOC: 10013993) <sup>ac</sup>                            | 69          | 1.71 | 1.35                  | 1.71 | 20.28    | 0.77  | 0.41  | 1.71 | 1.35   |
| Cardiac disorders (SOC: 10007541)                                                    | 61          | 0.30 | 0.24                  | 0.31 | 96.28    | -1.70 | -2.05 | 0.31 | 0.24   |
| Metabolism and nutrition disorders (SOC: 10027433)                                   | 39          | 0.20 | 0.15                  | 0.21 | 121.23   | -2.28 | -2.70 | 0.21 | 0.15   |
| Reproductive system and breast disorders (SOC: 10038604)                             | 25          | 0.42 | 0.28                  | 0.42 | 19.98    | -1.25 | -1.78 | 0.42 | 0.28   |
| Surgical and medical procedures (SOC: 10042613)                                      | 25          | 0.18 | 0.12                  | 0.18 | 95.96    | -2.49 | -3.01 | 0.18 | 0.12   |
| Renal and urinary disorders (SOC: 10038359)                                          | 25          | 0.13 | 0.08                  | 0.13 | 152.42   | -2.97 | -3.49 | 0.13 | 0.09   |
| Social circumstances (SOC: 10041244)                                                 | 21          | 0.42 | 0.28                  | 0.43 | 16.40    | -1.23 | -1.81 | 0.43 | 0.28   |
| Neoplasms benign, malignant and unspecified (incl cysts and polyps) (SOC: 10029104)  | 14          | 0.03 | 0.02                  | 0.03 | 505.84   | -5.18 | -5.83 | 0.03 | 0.02   |
| Hepatobiliary disorders (SOC: 10019805)                                              | 10          | 0.12 | 0.07                  | 0.12 | 61.98    | -3.00 | -3.75 | 0.12 | 0.07   |
| Congenital, familial and genetic disorders (SOC: 10010331)                           | 5           | 0.19 | 0.08                  | 0.19 | 17.91    | -2.43 | -3.40 | 0.19 | 0.08   |
| Pregnancy, puerperium and perinatal conditions (SOC: 10036585)                       | 5           | 0.15 | 0.06                  | 0.15 | 24.64    | -2.76 | -3.71 | 0.15 | 0.06   |
| Blood and lymphatic system disorders (SOC: 10005329)                                 | 4           | 0.02 | 0.01                  | 0.02 | 166.59   | -5.42 | -6.40 | 0.02 | 0.01   |
| Endocrine disorders (SOC: 10014698)                                                  | 3           | 0.12 | 0.04                  | 0.12 | 20.40    | -3.11 | -4.20 | 0.12 | 0.04   |

<sup>a</sup>: SOCs met the criteria of ROR algorithm. <sup>b</sup>: SOCs met the criteria of PRR algorithm. <sup>c</sup>: SOCs met the criteria of BCPNN algorithm. <sup>d</sup>: SOCs met the criteria of MGPS algorithm. The colors of the individual table cells represent the values of each index.

**Supplementary Table S6.** Case number and signal strength of 33 rimegepant-unrelated signals at the PT level.

| PT                                                                    | Case Number | ROR    | Lower limit of 95% CI | PRR    | $\chi^2$ | IC   | IC025 | EBGM   | EBGM05 |
|-----------------------------------------------------------------------|-------------|--------|-----------------------|--------|----------|------|-------|--------|--------|
| <b>Product issues (SOC: 10077536)</b>                                 |             |        |                       |        |          |      |       |        |        |
| Product physical issue (PT: 10071134)                                 | 33          | 10.65  | 7.56                  | 10.62  | 285.48   | 3.40 | 2.54  | 10.55  | 7.48   |
| Product taste abnormal (PT: 10069227)                                 | 24          | 10.85  | 7.26                  | 10.83  | 212.53   | 3.43 | 2.37  | 10.75  | 7.19   |
| Product packaging quantity issue (PT: 10069299)                       | 15          | 7.64   | 4.60                  | 7.63   | 85.99    | 2.93 | 1.70  | 7.60   | 4.57   |
| Product solubility abnormal (PT: 10069229)                            | 14          | 16.53  | 9.76                  | 16.51  | 201.66   | 4.03 | 2.26  | 16.33  | 9.64   |
| Product packaging issue (PT: 10069405)                                | 13          | 8.28   | 4.80                  | 8.27   | 82.66    | 3.04 | 1.67  | 8.23   | 4.77   |
| Product after taste (PT: 10086446)                                    | 11          | 47.59  | 26.09                 | 47.54  | 484.81   | 5.52 | 2.43  | 46.02  | 25.23  |
| Product packaging difficult to open (PT: 10079403)                    | 9           | 12.34  | 6.40                  | 12.33  | 92.92    | 3.61 | 1.61  | 12.24  | 6.35   |
| Product dosage form issue (PT: 10069232)                              | 6           | 73.97  | 32.54                 | 73.93  | 410.09   | 6.14 | 1.57  | 70.28  | 30.92  |
| Packaging design issue (PT: 10079080)                                 | 3           | 31.46  | 10.02                 | 31.45  | 86.50    | 4.94 | 0.40  | 30.78  | 9.80   |
| <b>Injury, poisoning and procedural complications (SOC: 10022117)</b> |             |        |                       |        |          |      |       |        |        |
| Exposure during pregnancy (PT: 10073513)                              | 56          | 4.91   | 3.77                  | 4.89   | 172.81   | 2.29 | 1.81  | 4.88   | 3.75   |
| Product use complaint (PT: 10079400)                                  | 43          | 12.58  | 9.31                  | 12.53  | 452.29   | 3.64 | 2.86  | 12.43  | 9.20   |
| Incorrect route of product administration (PT: 10081202)              | 25          | 5.31   | 3.58                  | 5.30   | 86.89    | 2.40 | 1.61  | 5.28   | 3.56   |
| Incorrect drug administration rate (PT: 10064306)                     | 6           | 7.61   | 3.41                  | 7.61   | 34.25    | 2.92 | 0.87  | 7.57   | 3.39   |
| <b>Consistent with indications</b>                                    |             |        |                       |        |          |      |       |        |        |
| Migraine (PT: 10027599)                                               | 267         | 17.96  | 15.89                 | 17.51  | 4112.58  | 4.11 | 3.85  | 17.31  | 15.32  |
| Headache (PT: 10019211)                                               | 256         | 2.82   | 2.49                  | 2.77   | 292.22   | 1.47 | 1.28  | 2.77   | 2.45   |
| Dizziness (PT: 10013573)                                              | 181         | 2.65   | 2.29                  | 2.62   | 182.72   | 1.39 | 1.16  | 2.62   | 2.26   |
| Vertigo (PT: 10047340)                                                | 29          | 3.64   | 2.53                  | 3.63   | 55.25    | 1.86 | 1.21  | 3.63   | 2.52   |
| Medication overuse headache (PT: 10072720)                            | 20          | 128.53 | 81.28                 | 128.28 | 2314.47  | 6.88 | 3.51  | 117.63 | 74.39  |
| Tension headache (PT: 10043269)                                       | 12          | 20.43  | 11.55                 | 20.41  | 218.31   | 4.33 | 2.22  | 20.13  | 11.38  |
| Aura (PT: 10003791)                                                   | 11          | 51.73  | 28.33                 | 51.68  | 527.28   | 5.64 | 2.45  | 49.88  | 27.32  |
| Migraine with aura (PT: 10027607)                                     | 8           | 19.36  | 9.63                  | 19.34  | 137.26   | 4.25 | 1.69  | 19.09  | 9.50   |
| <b>Therapeutic product effect</b>                                     |             |        |                       |        |          |      |       |        |        |
| Drug ineffective (PT: 10013709)                                       | 2499        | 14.09  | 13.46                 | 10.88  | 22763.10 | 3.43 | 3.36  | 10.80  | 10.33  |
| Therapeutic product effect incomplete (PT: 10082200)                  | 422         | 17.15  | 15.55                 | 16.48  | 6082.43  | 4.03 | 3.83  | 16.31  | 14.78  |
| Therapeutic product effect decreased (PT: 10082201)                   | 160         | 10.38  | 8.88                  | 10.23  | 1325.63  | 3.35 | 3.04  | 10.17  | 8.69   |
| Therapeutic product effect variable (PT: 10082204)                    | 157         | 127.25 | 107.96                | 125.30 | 17776.85 | 6.85 | 5.82  | 115.12 | 97.67  |
| Therapeutic product effect delayed (PT: 10082202)                     | 91          | 62.97  | 51.00                 | 62.42  | 5266.07  | 5.90 | 4.88  | 59.80  | 48.43  |
| Drug ineffective for unapproved indication (PT: 10051118)             | 55          | 5.50   | 4.22                  | 5.47   | 200.57   | 2.45 | 1.95  | 5.46   | 4.18   |
| Therapeutic response shortened (PT: 10078575)                         | 38          | 4.99   | 3.63                  | 4.98   | 120.46   | 2.31 | 1.71  | 4.96   | 3.61   |
| Drug effect less than expected (PT: 10083365)                         | 22          | 7.56   | 4.97                  | 7.55   | 124.31   | 2.91 | 1.95  | 7.51   | 4.94   |
| Therapeutic response delayed (PT: 10053181)                           | 11          | 33.55  | 18.45                 | 33.52  | 338.94   | 5.03 | 2.32  | 32.76  | 18.01  |
| <b>Others</b>                                                         |             |        |                       |        |          |      |       |        |        |
| Unevaluable event (PT: 10062355)                                      | 67          | 5.53   | 4.35                  | 5.50   | 245.99   | 2.45 | 2.01  | 5.48   | 4.31   |
| Therapeutic response unexpected (PT: 10043417)                        | 22          | 3.35   | 2.20                  | 3.34   | 36.09    | 1.74 | 1.00  | 3.34   | 2.20   |
| Inhibitory drug interaction (PT: 10068071)                            | 3           | 14.05  | 4.51                  | 14.05  | 35.99    | 3.80 | 0.27  | 13.92  | 4.46   |

The colors of the individual table cells represent the values of each index.

**Supplementary Table S7.** Case number and signal strength of 24 rimegepant-related signals at the PT level.

| PT                                                                          | Case Number | ROR    | Lower limit of 95% CI | PRR    | $\chi^2$ | IC   | IC025 | EBGM   | EBGM05 |
|-----------------------------------------------------------------------------|-------------|--------|-----------------------|--------|----------|------|-------|--------|--------|
| <b>Gastrointestinal disorders (SOC: 10017947)</b>                           |             |        |                       |        |          |      |       |        |        |
| Nausea (PT: 10028813)                                                       | 598         | 5.58   | 5.13                  | 5.31   | 2105.75  | 2.40 | 2.27  | 5.29   | 4.87   |
| Abdominal pain upper (PT: 10000087)                                         | 133         | 4.47   | 3.77                  | 4.43   | 353.00   | 2.14 | 1.86  | 4.42   | 3.72   |
| Abdominal discomfort (PT: 10000059)                                         | 96          | 3.21   | 2.62                  | 3.19   | 144.33   | 1.67 | 1.34  | 3.18   | 2.60   |
| Dyspepsia (PT: 10013946)                                                    | 70          | 5.14   | 4.06                  | 5.12   | 231.25   | 2.35 | 1.93  | 5.10   | 4.03   |
| Paraesthesia oral (PT: 10057372)                                            | 16          | 7.89   | 4.83                  | 7.88   | 95.60    | 2.97 | 1.78  | 7.84   | 4.80   |
| Swollen tongue (PT: 10042727)                                               | 16          | 4.41   | 2.70                  | 4.41   | 42.02    | 2.14 | 1.17  | 4.40   | 2.69   |
| Hypoaesthesia oral (PT: 10057371)                                           | 14          | 7.22   | 4.27                  | 7.21   | 74.53    | 2.84 | 1.60  | 7.18   | 4.24   |
| Retching (PT: 10038776)                                                     | 11          | 3.96   | 2.19                  | 3.96   | 24.26    | 1.98 | 0.83  | 3.95   | 2.19   |
| Tongue discomfort (PT: 10077855)                                            | 10          | 10.92  | 5.86                  | 10.91  | 89.37    | 3.44 | 1.64  | 10.84  | 5.82   |
| Eructation (PT: 10015137) *                                                 | 9           | 3.98   | 2.07                  | 3.97   | 19.97    | 1.99 | 0.70  | 3.96   | 2.06   |
| Oral discomfort (PT: 10030973)                                              | 8           | 4.32   | 2.16                  | 4.32   | 20.37    | 2.11 | 0.69  | 4.31   | 2.15   |
| Vomiting projectile (PT: 10047708) *                                        | 3           | 8.84   | 2.84                  | 8.83   | 20.71    | 3.14 | 0.13  | 8.79   | 2.82   |
| <b>General disorders and administration site conditions (SOC: 10018065)</b> |             |        |                       |        |          |      |       |        |        |
| Feeling abnormal (PT: 10016322)                                             | 164         | 4.62   | 3.96                  | 4.56   | 456.55   | 2.19 | 1.93  | 4.55   | 3.90   |
| Hangover (PT: 10019133) *                                                   | 11          | 24.67  | 13.59                 | 24.64  | 245.23   | 4.60 | 2.20  | 24.24  | 13.35  |
| Performance status decreased (PT: 10048919) *                               | 9           | 17.92  | 9.28                  | 17.91  | 141.86   | 4.15 | 1.81  | 17.69  | 9.17   |
| Feeling drunk (PT: 10016330) *                                              | 7           | 8.99   | 4.28                  | 8.99   | 49.38    | 3.16 | 1.14  | 8.94   | 4.25   |
| <b>Nervous system disorders (SOC: 10029205)</b>                             |             |        |                       |        |          |      |       |        |        |
| Somnolence (PT: 10041349)                                                   | 123         | 4.36   | 3.65                  | 4.32   | 314.26   | 2.11 | 1.81  | 4.31   | 3.61   |
| Head discomfort (PT: 10019194)                                              | 22          | 7.22   | 4.74                  | 7.20   | 116.93   | 2.84 | 1.89  | 7.17   | 4.71   |
| <b>Immune system disorders (SOC: 10021428)</b>                              |             |        |                       |        |          |      |       |        |        |
| Hypersensitivity (PT: 10020751)                                             | 114         | 3.76   | 3.12                  | 3.73   | 227.53   | 1.90 | 1.59  | 3.72   | 3.09   |
| Reaction to excipient (PT: 10079925) *                                      | 9           | 16.52  | 8.56                  | 16.50  | 129.57   | 4.03 | 1.77  | 16.32  | 8.46   |
| Allergic reaction to excipient (PT: 10078853) *                             | 6           | 12.60  | 5.64                  | 12.60  | 63.50    | 3.64 | 1.14  | 12.49  | 5.59   |
| Reaction to food additive (PT: 10037977) *                                  | 6           | 337.32 | 138.35                | 337.12 | 1621.59  | 8.09 | 1.57  | 272.07 | 111.59 |
| <b>Respiratory, thoracic and mediastinal disorders (SOC: 10038738)</b>      |             |        |                       |        |          |      |       |        |        |
| Pharyngeal swelling (PT: 10082270)                                          | 11          | 3.63   | 2.01                  | 3.63   | 20.87    | 1.86 | 0.74  | 3.62   | 2.00   |
| <b>Ear and labyrinth disorders (SOC: 10013993)</b>                          |             |        |                       |        |          |      |       |        |        |
| Motion sickness (PT: 10027990) *                                            | 4           | 15.36  | 5.73                  | 15.35  | 53.09    | 3.93 | 0.68  | 15.20  | 5.67   |

\*Emerging findings of rimegepant-induced adverse events. The colors of the individual table cells represent the values of each index.
